# Supplementary material
Source: Elsevier journal article supplement (https://www.sciencedirect.com/science/article/pii/S0213911114002544)
Supplement: mmc1 [file S0213911114002544:mmc1.docx]

**Anexo. Material adicional**

**Apéndice I**

**Listado de investigadores del proyecto «Hipotiroidismo subclínico y consumo de sal yodada. Estudio de casos y controles multicéntrico en Castilla y León»**

| **Provincia** | **Organización** | **Ubicación** | **Nombre** |
| --- | --- | --- | --- |
| Ávila | Gerencia de atención primaria de Ávila | Centro de salud Ávila Sur Oeste | Auxiliadora Andrés Serrano |
| Carmen Redondo Sánchez |
| Felicidad Dapena Alonso |
| Mª Ángeles Esteban Jiménez |
| Mª Ángeles López Martín |
| Manuela Gutiérrez Hernández |
| Miguel Ángel Gutiérrez Almarza |
| Nuria Castañeda Armengog |
| Pedro Sánchez Gago |
| Susana Carretero Mendoza |
| Consultorio médico El Barraco | Aurora Ramos Ruano |
| Luis E. Blanco Montagut |
| Consultorio médico San Juan de la Nava | Ignacio Bretones Bravo |
| Burgos | Gerencia de atención primaria de Burgos | Centro de salud Cristóbal Acosta | Ana Isabel García Juez |
| Ana Isabel Mariscal Hidalgo |
| Cristina Dueñas Rodríguez |
| Felipe Salinas Ruiz |
| G. Javier Carrillo Santos |
| Ignacio del Campo Medrano |
| Javier Mañaricua Santiago |
| Mª Amor Pereda Millán |
| María Juez Pineda |
| Mª Teresa Martínez Mayora |
| Mª Victoria Alonso Quintana |
| Mercedes Rodríguez Castro |
| Nieves Paniego Bartolomé |
| Pilar Rodríguez Cardeñoso |
| Rosario García Díez |
| Centro de salud Gamonal Antigua | Ana Isabel Mahamud Varas |
| Ignacio Martínez Sancho |
| Centro de salud José Luis Santamaría | Carmen Escudero Martínez |
| Servicio territorial de sanidad y bienestar social de Burgos | Laboratorio de salud pública | Pilar Varela Cerviño |
| Sección de Epidemiología | José Luis Yáñez Ortega |
| León | Gerencia de atención primaria de El Bierzo | Unidad docente de El Bierzo | Mª Ángeles González Fernández |
| Centro de salud Ponferrada II | Ana Isabel Barranco San Martín |
| F. Javier Mencía Bartolomé |
| Jesús Cancelas Collazo |
| Sandra M. Correa Gil |
| Gerencia de atención primaria de León | Centro de salud Armunia | Javier Luis Marcos Olea |
| Centro de salud Eras de Renueva | Julián Zapico Espinosa |
| Mª Margarita Gallego de la Varga |
| Palencia | Gerencia de atención primaria de Palencia | Centro de salud Saldaña | Javier Quijano González |
| Jesús Díez Ruiz |
| Mercedes Guzmán Paredes |
| Centro de salud Eras del Bosque | Juan Carlos Arribas Herrera |
| Mª Paz González Esteban |
| Centro de salud Pintor Oliva | Alejandro Plaza Gutiérrez |
| Jesús Mª Triana Sánchez |
| Centro de salud Torquemada | María del Valle Alaiz Poza |
| Centro de salud Villada | Rubén Rodríguez Calvo |
| Centro de salud Villarramiel | Jesús Miguel González Rodríguez |
| María Irene Pardo García |
| Mª Pilar Baila Villar |
| Rafael Magdaleno Pérez |
| Servicio territorial de sanidad y bienestar social de Palencia | Sección de epidemiología | Eva Mª Vian González |
| Salamanca | Gerencia de atención primaria de Salamanca | Centro de salud La Fuente de San Esteban | Pedro Hernández Rivas |
| Centro de salud Peñaranda | Ismael Sanchidrián Velayos |
| Manuel Velayos Aranda |
| Centro de salud Vitigudino | José Manuel Guarido Mateos |
| Mª Nieves García Fernández |
| Segovia | Gerencia de atención primaria de Segovia | Centro de salud Fuentesaúco de Fuentidueña | Celia Gamarra Carrera |
| Emilio Ramos Sánchez |
| Soria |  | Farmacia Abejar | Mª Inmaculada Álvaro González |
| Valladolid | Gerencia de atención primaria Valladolid Este | Centro de salud Olmedo | Alberto Cortiñas González |
| Centro de salud Plaza Circular | Francisco Javier Ovejas Díez |
| Vicente Fernández Almazán |
| Gerencia de atención primaria Valladolid Oeste | Centro de salud Parque Alameda-Covaresa | Luis M. Castrillo Álvarez |
| Marta Cuadrado López |
| Centro de salud Pisuerga | María Dolores Anaya Ruiz |
| Centro de salud Tordesillas |  |
| Fernando Revilla Ramos |
| José Ignacio Pinilla Gimeno |
| Mª José Castellanos Alonso |
| Marisol Gutiérrez Pérez |
| Consultorio local Simancas | Isabel Criado González |
